# Supplementary material
Source: Elsevier journal article supplement (https://www.sciencedirect.com/science/article/pii/S188558572400241X)
Supplement: mmc1 [file mmc1.doc]

**SUPPLEMENTARY DATA**

**Table 1 of the supplementary data.** Univariate and multivariate analysis of predictors urinary sodium

**−**

|  | Univariate | | Multivariate | |
| --- | --- | --- | --- | --- |
|  | ß | *P* | ß | *P* |
| Age | −0.064 (−0.125 to −0.003) | .038 |  |  |
| Systolic BP | 0.381 (0.209−0.554) | < .001 | 0.306 (0.132-0.480) | .001 |
| De novo HF | 16.171 (7.679 to 24.663) | < .001 |  |  |
| Previous furosemide | −13.453 (−22.269 to −4.638) | .003 |  |  |
| Creatinine | −13.212 (−23.617 to −2.807) | .013 |  |  |
| Urea | −0.188 (−0.330 to −0.047) | .009 | −0.148 ((−0.285 to (−0.105) | .035 |
| Sodium | 0.548 (0.074 to 1.023) | .024 |  |  |
| NT-proBNP | −0.0003 (−0.0007 to −0.00001) | .059 |  |  |
| Congestion score | −2.681 (−5.210 to −0.151) | .038 |  |  |

BP, blood pressure; HF, heart failure, NT-proBNP, N-terminal pro-B-type natriuretic peptide.

**Figure 1 of the supplementary data.** Association of urinary sodium, as a continuous variable, and the hazard ratio for the main combined event using restricted cubic spline.

**
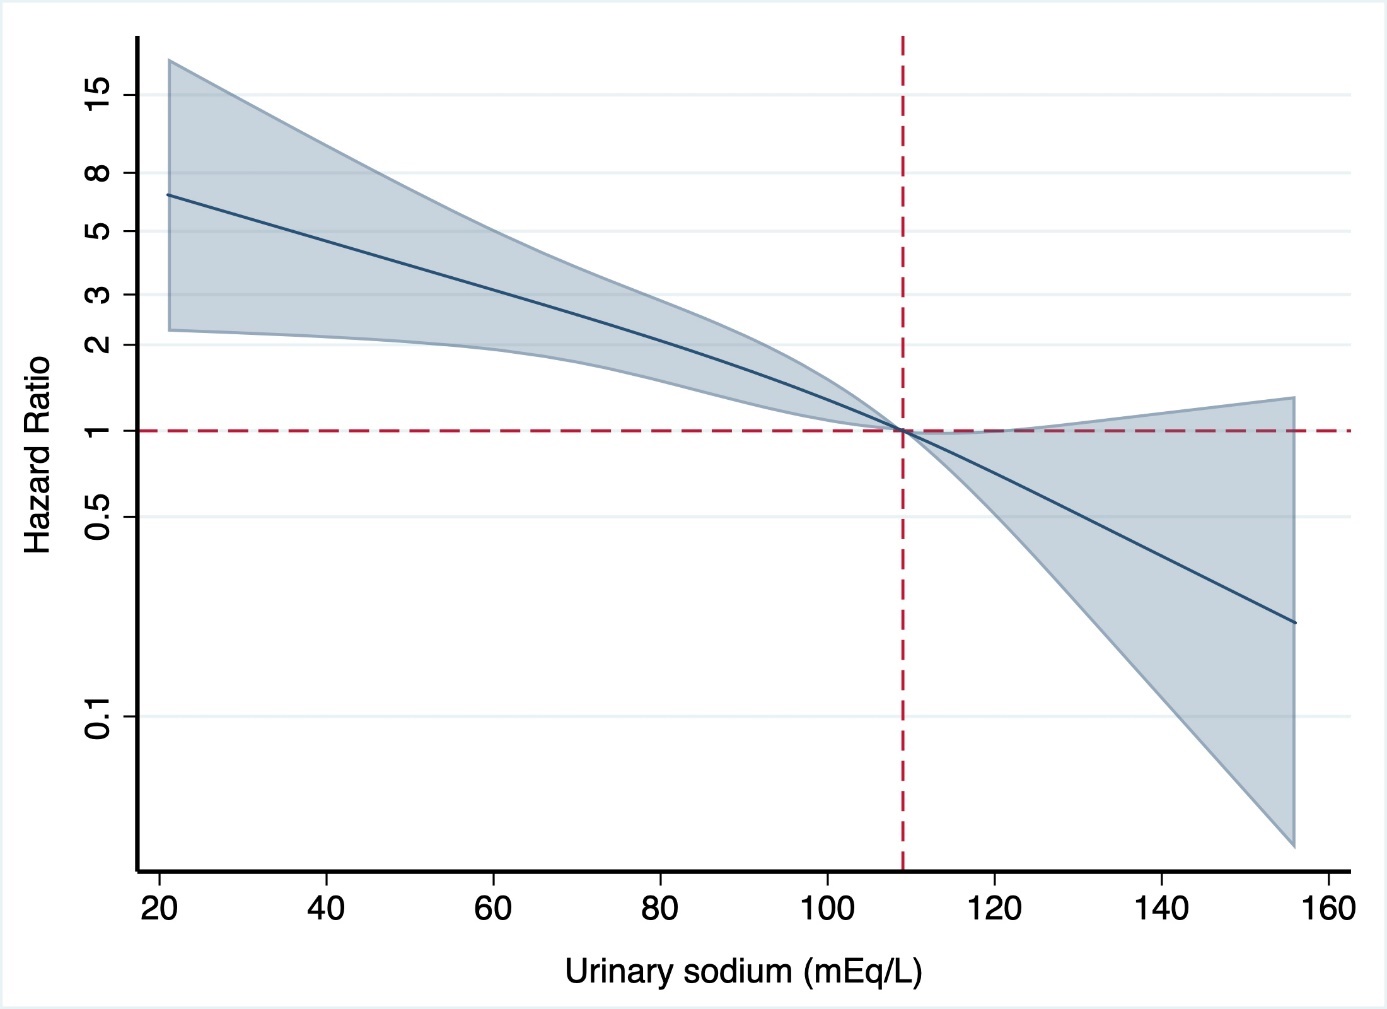
**

Cambiar “Hazard Ratio” a “Hazard ratio”
